# Supplementary material
Source: publisher figshare collection journal article supplement (https://sage.figshare.com/ndownloader/files/18598925)
Supplement: Supplementary file 1 [file 18598925]

**Supplementary table 2.** Patients missing from the trauma registry

MOI: Mechanism of Injury, AIS: Abbreviated Injury Scale, SDH: Subdural hematoma, ICH: Intracranial Hemorrhage, SAH:

| Patient | Age | Gender | MOI                                                         | Injuries (AIS)                                                                                                                          | NISS | Possible explanation for mistake                                                                                                                                                                                  |
|---------|-----|--------|-------------------------------------------------------------|-----------------------------------------------------------------------------------------------------------------------------------------|------|-------------------------------------------------------------------------------------------------------------------------------------------------------------------------------------------------------------------|
| 1       | 43  | Male   | Fell and hit his head                                       | Fractured skull (3)<br>brain contusion (3)                                                                                              | 18   | Maybe the brain contusion was first under graded<br><b>MISS INTERPRETATION OF INJURY (Brain)</b>                                                                                                                  |
| 2       | 24  | Male   | Passenger in a car accident                                 | Fractured proc. spinosus (2)<br>Fractured and compressed L1 vertebra (3)<br>Pneumothorax (2)<br>Fractured sternum (2)<br>Facial cut (1) | 17   | L1 fracture possible first under graded<br><b>MISS INTERPRETATION OF INJURY (L1 frx)</b>                                                                                                                          |
| 3       | 65  | Female | Fell from bed, hit her head                                 | Brain contusion over 6cm (5)                                                                                                            | 25   | Brain contusion maybe first under graded<br><b>MISS INTERPRETATION OF INJURY (Brain)</b>                                                                                                                          |
| 4       | 71  | Female | Fell and hit her head                                       | Major SDH (4)<br>Exitus                                                                                                                 | 16   | First thought that injury happened 5 days ago, because fell then also<br><b>MISS INTERPRETATION OF TIME OF INJURY</b>                                                                                             |
| 5       | 98  | Female | Fell in stairs at home                                      | Bilateral femur shaft fractures (3 + 3)<br>ICH (2)                                                                                      | 22   | NISS calculated only with one femur fracture<br><b>MISS INTERPRETATION OF NISS (bilateral injury)</b>                                                                                                             |
| 6       | 47  | Male   | Fell and hit his head                                       | SDH (4)<br>Brain contusion (3)<br>Scull base fracture(3)                                                                                | 34   | Injury happened on previous day and was transferred to Töölö hospital the next day, maybe thought that more than 24 hours had gone from the injury, but it hadn't<br><b>MISS INTERPRETATION OF TIME OF INJURY</b> |
| 7       | 55  | Male   | Had convulsion, fell and hit his head                       | SAH (3)<br>Scull base fracture (3)<br>Tiny brain contusion (2)                                                                          | 22   | First diagnose in the resuscitation bay log was pancreatitis, that might have mislead the trauma coordinator<br><b>MISS INTERPRETATION OF MED. HISTORY</b>                                                        |
| 8       | 82  | Male   | Fell on cruise-ship stairs the night before                 | Fractured ribs (3)<br>Haemopneumothorax (3)<br>Fractured scapula (2)                                                                    | 22   | First thought that injury happened over 24 hours ago<br><b>MISS INTERPRETATION OF TIME OF INJURY</b>                                                                                                              |
| 9       | 73  | Male   | Fell under the influence of drugs and alcohol, hit his head | Large intracranial hematoma (5)                                                                                                         | 25   | The brain injury maybe under graded<br><b>MISS INTERPRETATION OF INJURY (Brain)</b>                                                                                                                               |

## Subarachnoidal Hemorrhage
